# Supplementary material for: The Release of a Highly Cytotoxic Paullone Bearing a TEMPO Free Radical from the HSA Hydrogel: An EPR Spectroscopic Characterization
Source: Pharmaceutics. 2022 May 30;14(6):1174. doi: 10.3390/pharmaceutics14061174 (PMC9227768; doi:10.3390/pharmaceutics14061174)
Supplement: Supplementary file 1 [file pharmaceutics-14-01174-s001.zip › pharmaceutics-1732951-supplementary.pdf]

**Supplementary Material**  
for  
**The Release of a Highly Cytotoxic Paullone Bearing a TEMPO Free Radical  
from the HSA Hydrogel: An EPR Spectroscopic Characterization**

*Ana Vesković<sup>1</sup>, Đura Nakarada<sup>1</sup>, Olga Vasiljević<sup>1</sup>, Anatolie Dobrov<sup>2</sup>, Gabriella Spengler<sup>3,4</sup>,  
Éva A. Enyedy<sup>3</sup>, Vladimir B. Arion<sup>2</sup>, Ana Popović Bijelić<sup>1\*</sup>*

<sup>1</sup>*Faculty of Physical Chemistry, University of Belgrade, Studentski trg 12-16, 11158 Belgrade, Serbia*

<sup>2</sup>*Institute of Inorganic Chemistry, University of Vienna, Währinger Strasse 42, A-1090 Vienna, Austria*

<sup>3</sup>*MTA-SZTE Lendület Functional Metal Complexes Research Group, Department of Inorganic and  
Analytical Chemistry, University of Szeged, Dóm tér 7, H-6720 Szeged, Hungary*

<sup>4</sup>*Department of Medical Microbiology, Albert Szent-Györgyi Health Center and Albert Szent-Györgyi  
Medical School, University of Szeged, Semmelweis u. 6, H-6725 Szeged, Hungary*

\*Corresponding author: Ana Popović Bijelić, [ana@ffh.bg.ac.rs](mailto:ana@ffh.bg.ac.rs); EPR Laboratory, Faculty of Physical Chemistry, University of Belgrade, Studentski trg 12-16, 11158 Belgrade, Serbia; Phone/Fax. +381(0)112187133.

**List of Figures:**

**Scheme SI.** The structure of 7,12-dihydroindolo[3,2-d][1]benzazepin-6(5H)-one bearing the spin label 2,2,6,6-tetramethylpiperidine 1-oxyl (TEMPO) free-radical (**HL**).

**Figure S1.** The X-band EPR spectra of **HL** in 50 mL physiological saline after 24 h dialysis at room temperature of (a) 300 µL 0.5 mM **HL** / 5 mM HSA solution, and (b) 300 µL 0.25 mM **HL** / 5 mM HSA solution.

**Figure S2.** (a) The X-band EPR spectra of 5 mM 5-DS / 5 mM HSA solution as prepared (black), after 3 days (red), 4 days (green), 5 days (blue), and 7 days (cyan) of dialysis in 50 mL physiological saline at room temperature. (b) The rate of spontaneous 5-DS release from the 300 µL 5 mM 5-DS / 5 mM HSA solution during dialysis.

**Figure S3.** The calculated location of **HL** and TEMPO within Sudlow 2 site of HSA, pdb ID: 2bxg, (a and b), and BSA, pdb ID: 4or0, (c and d), respectively. The superimposed protein structures are represented in grey, and ligand structures are represented in purple.

## 1. Structure of the cytotoxic ligand **HL**

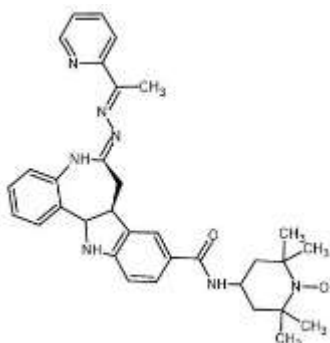

**Scheme I.** The structure of 7,12-dihydroindolo[3,2-d][1]benzazepin-6(5H)-one bearing the spin label 2,2,6,6-tetramethylpiperidine 1-oxyl (TEMPO) free-radical (**HL**).

## 2. **HL** release from the HSA solution and hydrogel during dialysis

The presence of the cytotoxic paullone ligand bearing a TEMPO free-radical group (**HL**) in physiological saline, released from the **HL**/HSA solutions and hydrogels during the course of dialysis was monitored by EPR spectroscopy. Representative spectra are shown for **HL** in 50 mL physiological saline after 24 h dialysis of 300  $\mu$ L 5 mM HSA solutions containing 0.5 or 0.25 mM **HL**, Figure S1.

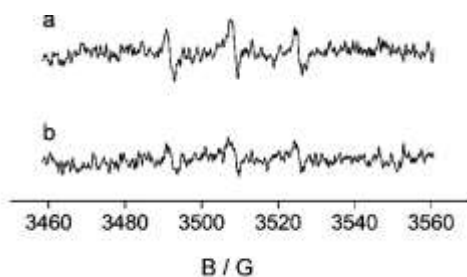

**Figure S1.** The X-band EPR spectra of **HL** in 50 mL physiological saline after 24 h dialysis at room temperature of (a) 300  $\mu$ L 0.5 mM **HL** / 5 mM HSA solution, and (b) 300  $\mu$ L 0.25 mM **HL** / 5 mM HSA solution.

### 3. 5-DS release from the HSA solution during dialysis

The dialysis of a 300  $\mu\text{L}$  5 mM 5-doxyl stearic acid (5-DS) / 5 mM HSA solution in 50 mL physiological saline at room temperature for 7 days was performed as a control experiment for that of the corresponding hydrogel. It was determined that the solution was not able to retain the spin-labeled fatty acid as the hydrogel, releasing 95 % 5-DS after 7 days, Figure S2.

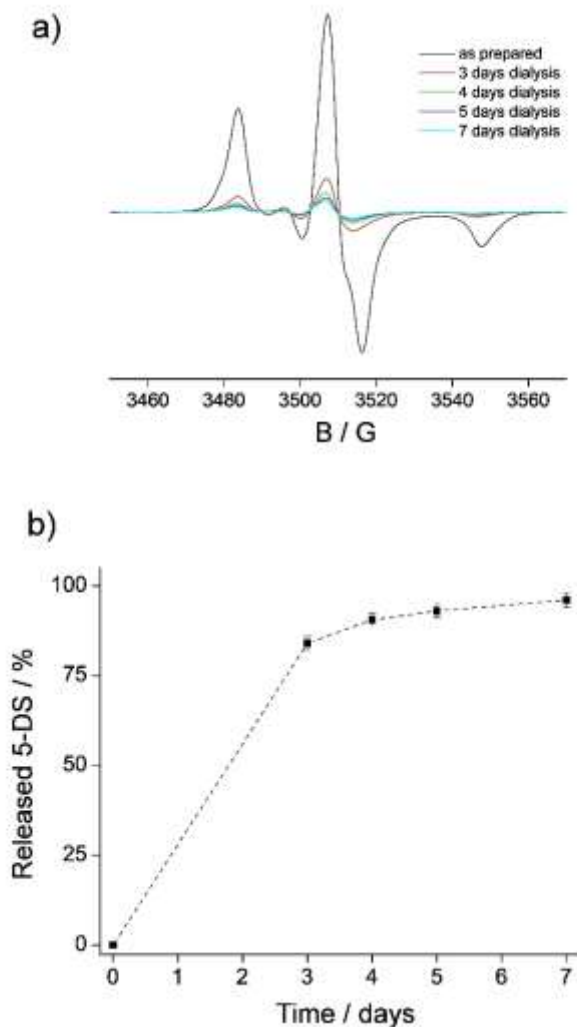

**Figure S2.** (a) The X-band EPR spectra of 5 mM 5-DS / 5 mM HSA solution as prepared (black), after 3 days (red), 4 days (green), 5 days (blue), and 7 days (cyan) of dialysis in 50 mL physiological saline at room temperature. (b) The rate of spontaneous 5-DS release from the 300  $\mu\text{L}$  5 mM 5-DS / 5 mM HSA solution during dialysis.

#### 4. Molecular docking of HL and TEMPO to HSA and BSA

The MD calculations showed that both, **HL** and its structural segment, TEMPO, are accommodated within the hydrophobic cavity of the subdomain IIIA (which contains the drug-binding, Sudlow 2 site) in HSA, as well as in BSA, Figure S3.

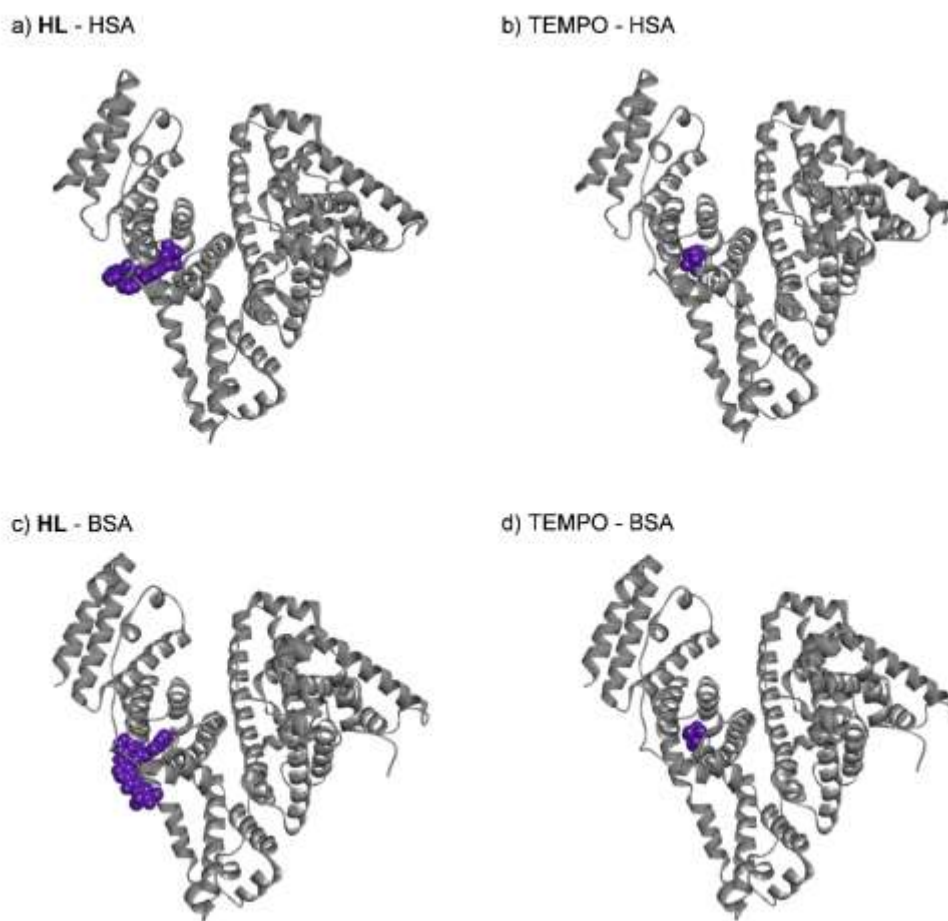

**Figure S3.** The calculated location of **HL** and TEMPO within Sudlow 2 site of HSA, pdb ID: 2bxg, (**a** and **b**), and BSA, pdb ID: 4or0, (**c** and **d**), respectively. The superimposed protein structures are represented in grey, and ligand structures are represented in purple.
